# Supplementary material
Source: Research Square preprint supplement (doi:10.21203/rs.3.rs-8803823/v1)
Supplement: Supplementary file 1 [file 0407f1d5ec19dc6cd4bad9b7.docx]

**Table 2.** Between-group comparisons of neuromuscular variables across six youth trained martial art sports.

| **Variables** | **Total**  **(Mean + SD)**  **(95 % CI)** | **Judo**  **(Mean + SD)**  **(95 % CI)** | **Jujitsu**  **(Mean + SD)**  **(95% CI)** | **Muay Thai**  **(Mean + SD)**  **(95 % CI)** | **Wrestling**  **(Mean + SD)**  **(95 % CI)** | **Taekwondo**  **(Mean + SD)**  **(95 % CI)** | **Pencak silat (Mean + SD)**  **(95 % CI)** | **F** | **p** | **η²p** |
| --- | --- | --- | --- | --- | --- | --- | --- | --- | --- | --- |
| Height jump FT (cm) | 24.84 ± 7.55  [23.45–26.24] | 22.61 ± 7.17  [19.71–25.50] | 28.49 ± 6.29  [25.01–31.97] | 22.76 ± 6.37  [19.67–25.83] | 23.72 ± 5.42  [21.25–26.19] | 26.28 ± 9.09  [21.77–30.80] | 27.40 ± 9.54  [22.32–32.48] | 2.134 | 0.067 | 0.089 |
| Height jump V (cm) | 22.00 ± 7.91  [20.53–23.46] | 21.20 ± 6.25  [18.68–23.72] | 21.77± 6.53  [18.16–25.39] | 18.69 ± 8.81  [14.45–22.94] | 20.44 ± 6.99  [17.26–23.63] | 24.94 ± 9.76  [20.09–29.79] | 26.14 ± 7.59  [22.09–30.18] | 2.392 | 0.042 | 0.099 |
| CMJ_D_PF (N) | 759.11 ± 226.30  [717.31–800.92] | 755.11 ± 260.29  [649.97–860.24] | 772.51 ± 166.15  [630.61–813.15] | 624.86 ± 224.60  [546.61–763.12] | 848.43 ± 222.69  [747.06–949.80] | 667.14 ± 222.49  [556.50–777.78] | 863.11 ± 144.69  [786.01–940.21] | 2.982 | 0.015 | 0.120 |
| CMJ_ND_PF (N) | 710.21 ± 208.59  [671.68–748.74] | 692.19± 222.64  [602.26–782.17] | 721.88 ± 164.81  [630.61–813.15] | 628.60 ± 221.19  [628.60–735.21] | 780.09 ± 202.85  [630.61–813.15] | 642.01 ± 210.46  [537.35–746.66] | 810.46 ± 163.26  [723.47–897.46] | 2.358 | 0.045 | 0.098 |
| CMJ_Total_PF (N) | 1,468.42 ± 434.37  [1,388.19–1,548.66] | 1,447.30 ± 480.30  [1,253.30–1,461.30] | 1,494.37 ± 326.59  [1,313.52–1,675.23] | 1,283.27 ± 445.28  [1,068.65–1,497.87] | 1,623.75 ± 434.72  [1,425.87–1,821.63] | 1,309.16 ± 432.45  [1,094.11–1,524.22] | 1,673.59 ± 306.36  [1,510.34–1,836.84] | 2.623 | 0.028 | 0.107 |
| CMJ_Asymmetry | 6.18 ± 5.00  [5.26–7.11] | 7.75 ± 5.13  [5.68–9.82] | 6.44 ± 6.33  [2.94–9.94] | 9.94 ± 6.32  [2.60–5.65] | 7.90 ± 5.32  [5.48–10.32] | 3.50 ± 2.77  [2.11–4.87] | 6.61 ± 5.23  [3.82–9.40] | 2.959 | 0.015 | 0.119 |
| IMTP_D_PF (N) | 985.89 ± 310.89  [928.46–1,043.21] | 976.38 ± 265.55  [918.43–1,159.15] | 1,038.79 ± 217.34  [918.43–1,159.15] | 891.63 ± 382.88  [707.08–1,076.17] | 1,006.89 ± 302.86  [869.03–1,144.75] | 887.29 ± 352.84  [711.83–1,062.75] | 1,147.06± 281.83  [996.89–1,297.24] | 1.737 | 0.132 | 0.074 |
| IMTP_ND_PF (N) | 912.50 ± 291.10  [858.73–966.27] | 891.99 ± 244.65  [793.18–990.81] | 954.07 ± 218.23  [833.22–1,074.93] | 836.38 ± 386.94  [649.89–1,022.88] | 923.79 ± 264.51  [803.39–1,044.20] | 825.68 ± 327.28  [662.94–988.44] | 1,080.06 ± 237.61  [953.45–1,206.68] | 1.794 | 0.120 | 0.076 |
| IMTP_Total_PF (N) | 1,897.81 ± 598.68  [1,787.21–2,008.40] | 1,868.37 ± 507.29  [1,664.47–2,073.26] | 1,988.67 ± 436.22  [1,747.10–2,230.25] | 1,727.51 ± 769.25  [1,356.74–2,098.28] | 1,930.73 ± 560.75  [1,675.48–2,185.98] | 1,713.23 ± 675.60  [1,377.27–2,049.20] | 2,227.11 ± 516.03  [1,952.14–2,502.09] | 1.770 | 0.125 | 0.075 |
| IMTP_Asymmetry | 7.41 ± 5.17  [6.36–8.47] | 8.60 ± 5.45  [6.40–10.80] | 8.73± 5.30  [5.79–11.67] | 7.04 ± 5.31  [4.48–9.60] | 7.72 ± 6.70  [4.67–10.78] | 6.54 ± 6.39  [3.37–9.71] | 5.28 ± 4.69  [2.78–7.78 | 0.941 | 0.458 | 0.041 |
| Lower limbs_DSI | 0.81 ± 0.20  [0.77–0.84] | 0.79 ± 0.18  [0.71–0.86] | 0.76 ± 0.12  [0.70–0.83] | 0.83 ± 0.30  [0.70–0.97] | 0.86 ± 0.17  [0.79–0.94] | 0.82 ± 0.23  [0.70–0.93] | 0.76 ± 0.10  [0.70–0.81] | 0.826 | 0.534 | 0.037 |
| Grip strength_D_PF (N) | 275.97± 92.84  [258.82–293.12] | 274.37 ± 74.70  [244.20–304.54] | 291.99 ± 75.26  [250.32–333.67] | 256.13 ± 111.75  [202.27–309.99] | 304.61 ± 95.51  [261.14–348.09] | 242.41 ± 90.58  [197.36–287.445] | 287.29 ± 105.27  [231.19–343.38] | 1.192 | 0.318 | 0.052 |
| Grip strength_ND_PF (N) | 253.50 ± 88.56  [237.14–269.86] | 251.60 ± 71.64  [222.66–280.54] | 291.99 ± 75.26  [250.32–333.67] | 234.47 ± 115.14  [178.98–289.97] | 275.12 ± 84.86  [236.49–313.75] | 217.62 ± 83.46  [176.12–259.12] | 255.08 ± 90.60  [206.81–303.36] | 1.631 | 0.158 | 0.070 |
| Total grip strength_PF (N) | 525.69 ± 177.53  [492.89–558.48] | 525.97 ± 144.72  [467.51–584.42] | 553.24 ± 133.70  [479.20–627.28] | 492.02 ± 226.81  [382.70–601.34] | 579.69 ± 178.95  [498.23–661.14] | 460.03 ± 172.80  [374.10–545.96] | 542.38 ± 194.73  [438.61–646.14] | 1.124 | 0.352 | 0.049 |
| Grip_asymmetry | 9.70 ± 7.41  [8.33–11.07] | 7.75 ± 6.16  [5.26–10.24] | 9.45 ± 6.12  [6.06–12.84] | 12.32 ± 9.71  [7.64–17.00] | 9.02 ± 7.10  [5.79–12.25] | 10.21 ± 7.70  [6.38–14.03] | 10.29 ± 7.45  [6.32–14.26] | 0.903 | 0.482 | 0.040 |
| NHE_D_PF (N) | 243.39 ± 75.71  [229.41–257.38] | 283.15 ± 63.98c***,e*  [257.31–308.99] | 230.54 ± 55.81  [199.64–261.45] | 195.06 ± 78.48a***,f**  [157.23–232.89] | 235.01 ± 80.56  [198.34–271.68] | 216.08 ± 51.23a,f*  [190.61–241.56] | 289.98 ± 75.16c**,e*  [249.93–330.02] | 5.813 | <0.001 | 0.211 |
| NHE_ND_PF (N) | 215.52 ± 69.94  [202.60–228.44] | 251.07± 65.43c***,e*  [224.65–277.50] | 204.15 ± 49.40  [176.79–231.50] | 164.85 ± 69.38a,f***  [131.41–198.30] | 215.29 ± 70.68  [183.12–247.46] | 188.17 ± 43.06  [166.76–209.59] | 259.63 ± 68.46 c***,e*  [223.15–296.10] | 6.505 | <0.001 | 0.230 |
| NHE_Total_PF (N) | 458.90 ± 143.65  [432.37–385.44] | 534.21 ± 126.66 c***,e*  [483.05–585.37] | 434.70 ± 101.25  [378.63–490.77] | 359.93 ± 146.39 a,f***  [289.37–430.48] | 450.23 ± 149.95  [381.97–518.48] | 404.27 ± 92.06 a,f*  [358.49–450.05] | 549.60 ± 141.23 c***,e*  [474.35–624.85] | 6.329 | <0.001 | 0.225 |
| NHE_Asymmetry | 11.29 ± 8.68  [9.69–12.90] | 11.47 ± 9.11  [7.79–15.16] | 10.69 ± 9.99  [5.17–16.22] | 14.88 ± 9.22  [10.44–19.33] | 8.26 ± 6.98  [5.09–11.44] | 12.31 ± 7.81  [8.43-16.20] | 10.13 ± 8.52  [5.58–14.67] | 1.304 | 0.268 | 0.056 |
| **Notes:** Data are Mean ± SD [95% CI]. F, p, and η²p are from one-way ANOVA (four groups: 8–11, 12–14, 15–16, 17–18 years). Bonferroni-adjusted post hoc comparisons and Cohen’s d are provided. Abbreviations: Height jump FT = Jump height calculated using flight time; Height jump V = Jump height calculated via velocity-time integration; D = dominant limb; ND = non-dominant limb; PF = peak force; CMJ = counter movement jump; IMTP = isometric mid-thigh pull; NHE = Nordic hamstring exercise. a, b, c, d different from group 1, group 2, group 3 and group 4 and *, ** and *** represents between-group comparisons for a p < 0.05, < 0.01 and < 0.001 (respectively). | | | | | | | | | | |
