# Supplementary material
Source: Research Square preprint supplement (doi:10.21203/rs.3.rs-8803823/v1)
Supplement: Supplementary file 2 [file 4ff9cb72448cfde264b78222.docx]

**Table 1.** Descriptive of competitive and training profile, general characteristics and maturational indicators of six youth trained martial art sports.

| **Variables** | **Total**  **(Mean + SD)**  **(95 % CI)** | **Judo**  **(Mean + SD)**  **(95 % CI)** | **Jujitsu**  **(Mean + SD)**  **(95% CI)** | **Muay Thai**  **(Mean + SD)**  **(95 % CI)** | **Wrestling (Mean + SD)**  **(95 % CI)** | **Taekwondo (Mean + SD)**  **(95 % CI)** | **Pencak silat (Mean + SD)**  **(95 % CI)** | ***F*** | ***p*-value** | **η²ₚ** |
| --- | --- | --- | --- | --- | --- | --- | --- | --- | --- | --- |
| **Competitive and training profile** | | | | | | | | | | |
| Training day / week (day) | 5.32 ± 0.47  [5.24–5.41] | 5.00 ± 0.00  [5.00–5.00] | 5.00 ± 0.00  [5.00–5.00] | 6.00 ± 0.00  [6.00–6.00] | 5.00 ± 0.00  [5.00–5.00] | 6.00 ± 0.00  [6.00–6.00] | 5.00 ± 0.00  [5.00–5.00] | 7.90 | 0.006 | 0.066 |
| Training session / week (session) | 7.18 ± 0.66  [7.06–7.30] | 7.00 ± 0.00  [7.00–7.00] | 7.00 ± 0.00  [7.00–7.00] | 8.00 ± 0.00  [8.00–8.00] | 7.00 ± 0.00  [7.00–7.00] | 8.00 ± 0.00  [8.00–8.00] | 7.00 ± 0.00  [7.00–7.00] | 7.93 | 0.005 | 0.066 |
| Total competitions (N) | 18.38 ± 5.59  [17.35–19.42] | 18.62 ± 5.73  [16.30–20.93] | 18.62 ± 3.50  [16.59–20.47] | 19.42 ± 3.60  [17.69–21.15] | 18.08 ± 6.16  [15.24–20.85] | 15.06 ± 5.44  [12.35–17.76] | 18.36 ± 5.30  [15.55–21.20] | 1.281 | 0.225 | 0.173 |
| Days since last fight (day) | 24.87 ± 5.79  [23.80–25.94] | 24.73 ± 5.03  [22.70–26.76] | 24.33 ± 8.11  [19.84–28.83] | 22.68 ± 5.65  [19.96–25.41] | 27.81 ± 6.19  [24.99–30.63] | 24.94 ± 4.49  [22.71–27.18] | 24.25 ± 4.45  [21.88–26.62] | 0.55 | 9.939 | 0.104 |
| **General characteristics and maturational indicators** | | | | | | | | | | |
| Chronological age (yrs) | 14.37 ± 1.72  [14.06–14.69] | 14.23 ± 1.82  [13.69–15.16] | 15.47 ± 0.83  [15.01–15.93] | 14.53 ± 1.65  [13.73–15.32] | 14.62 ± 1.80  [13.80–15.44] | 14.17 ± 0.70  [13.82–14.52] | 14.25 ± 1.98  [13.19–15.31] | 1.37 | 0.240 | 0.059 |
| Maturity offset (yrs) | -1.34 ± 2.07  [-1.73– -0.96] | -1.85 ± 1.95  [-2.64– -1.06] | 0.01 ± 1.31  [-0.72– 0.73] | -1.38 ± 2.84  [-1.38– -0.28] | -0.88 ± 2.68  [-2.11– 0.33] | -2.21 ± 0.82  [-2.61– -1.80] | -1.37 ± 2.12  [-2.50– -0.24] | 2.60 | 0.029 | 0.106 |
| Body height (cm) | 165.06 ± 10.09  [163.19–166.92] | 163.60 ± 1.82  [160.73–166.46] | 170.13 ± 6.66  [166.44–173.82] | 161.58 ± 12.60  [155.51–167.65] | 166.57 ± 8.99  [162.48–170.67] | 161.11 ± 12.40  [154.95–167.28] | 169.25 ± 9.51  [164.18–174.32] | 2.71 | 0.024 | 0.110 |
| Arm span (cm) | 164.01 ± 11.23  [164.01–165.50] | 166.50 ± 8.91  [162.90–170.10] | 166.40 ± 4.79  [163.75–169.05] | 159.32 ± 13.50  [152.81–165.82] | 162.71 ± 10.55  [157.91–167.52] | 158.56 ± 12.40  [152.39–164.72] | 171.13 ± 11.24  [165.14–177.12] | 3.62 | 0.005 | 0.142 |
| Body mass (kg) | 55.99 ± 14.37  [53.37–58.64] | 53.86 ± 13.92  [48.24–59.48] | 61.88 ± 12.47  [54.97–68.79] | 48.98 ± 14.38 f**  [42.06–55.92] | 58.01 ± 12.81  [52.18–63.85] | 50.84 ± 14.73f*  [43.52–58.16] | 65.38 ± 12.30c**, e*  [58.82–71.93] | 3.86 | 0.003 | 0.151 |
| Body-mass index (kg·m⁻²) | 19. 93 ± 3.67  [19.25–20.61] | 19. 92 ± 3.95  [18.33–21.52] | 18. 90 ± 4.69  [16.30–21.50] | 18. 33 ± 2.64  [17.06–19.60] | 20. 71 ± 3.53  [19.10–22.32] | 19. 18 ± 3.08  [19.18–20.71] | 22. 61 ± 2.57  [21.25–23.98] | 3.31 | 0.008 | 0.132 |
| Percent body fat (%) | 12. 13 ± 6.52  [10.93–13.34] | 10.86 ± 8.16 f*  [7.57–14.16] | 15.09 ± 6.12b c**  [11.71–18.48] | 7.50 ± 2.54 b**, f ***  [6.28–8.72] | 12.56 ± 6.43  [9.63–15.48] | 11.97 ± 5.09  [9.44–14.50] | 16.55 ± 5.04c***  [13.86–19.24] | 4.95 | < 0.001 | 0.185 |
| Fat mass (kg) | 7.25 ± 5.53  [6.23–8.27] | 6.78 ± 7.08  [3.91–9.64] | 7.91 ± 4.87  [5.21–10.61] | 3.96 ± 2.42  [2.80–5.13] | 7.91 ± 5.34  [5.49–10.34] | 6.53 ± 4.53  [4.27–8.62] | 11.28 ± 4.98  [8.62–13.93] | 3.62 | 0.005 | 0.142 |
| Skeletal muscle mass (kg) | 27.20 ± 5.41  [26.21–28.20] | 26.35 ± 4.34  [24.59–28.10] | 29.37 ± 4.24  [27.02–31.72] | 25.26 ± 6.73  [22.02–28.50] | 28.26 ± 4.67  [26.13–30.38] | 24.81 ± 6.11  [21.77–27.85] | 30.18 ± 4.44  [27.81–32.54] | 3.22 | 0.009 | 0.129 |
| Right-hand 2D:4D | 0.98 ± 0.05  [0.98–0.99] | 0.99 ± 0.03  [0.97–1.00] | 1.00 ± 0.00  [1.00–1.00] | 0.99 ± 0.09  [0.95–1.04] | 0.97 ± 0.05  [0.95–1.00] | 0.99 ± 0.05  [0.96–1.01] | 0.95 ± 0.05  [0.95–1.00] | 0.81 | 0.548 | 0.036 |
| Left-hand 2D:4D | 0.98 ± 0.05  [0.97–0.99] | 0.98 ± 0.04  [0.96–0.99] | 0.98 ± 0.03  [0.96–1.00] | 1.00 ± 0.09  [0.96–1.04] | 0.96 ± 0.05  [0.94–0.99] | 0.98 ± 0.05  [0.95–1.00] | 0.98 ± 0.02  [0.96–1.00] | 1.14 | 0.346 | 0.049 |
| Difference (RF–LF) | 0.09 ± 0.91  [-0.08–0.26] | 0.01 ± 0.04  [-0.00–0.03] | 0.02 ± 0.03  [-0.00–0.04] | -0.01 ± 0.02  [-0.02–0.00] | 0.01 ± 0.03  [-0.00–0.03] | 0.01 ± 0.04  [-0.01–0.03] | -0.01 ± 0.02  [-0.02–0.00] | 2.09 | 0.072 | 0.008 |
| **Notes:** Data are Mean ± SD [95% CI]. F, p, and η²p are from one-way ANOVA (six martial arts sport disciplines).Turkey-adjusted post hoc comparisons and Cohen’s d are provided. Abbreviations: 2D:4D = Second-to-Fourth digit ratio; RF – LF = difference 2D:4D Right​−2D:4D Left. a, b, c, d, e, f different from judo, jujitsu, Muay Thai, wrestling, taekwondo and pencak silat and *, ** and *** represents between-group comparisons for a p < 0.05, < 0.01 and < 0.001 (respectively). | | | | | | | | | | |
