# Supplementary material
Source: Research Square preprint supplement (doi:10.21203/rs.3.rs-8803823/v1)
Supplement: Supplementary file 3 [file d6d41a614c8a9d0eab4b0d63.docx]

**Table 3.** Between-group comparisons of cognitive function variables across six youth trained martial art sports.

| **Variables** | **Total**  **(Mean + SD)**  **(95 % CI)** | **Judo**  **(Mean + SD)**  **(95 % CI)** | **Jujitsu**  **(Mean + SD)**  **(95% CI)** | **Muay Thai**  **(Mean + SD)**  **(95 % CI)** | **Wrestling**  **(Mean + SD)**  **(95 % CI)** | **Taekwondo**  **(Mean + SD)**  **(95 % CI)** | **Pencak silat (Mean + SD)**  **(95 % CI)** | **F** | **p** | **η²p** |
| --- | --- | --- | --- | --- | --- | --- | --- | --- | --- | --- |
| SRT_Avg | 279.00 ± 87.90  [262.76–295.24] | 308.96 ± 102.34  [267.62–350.30] | 234.92 ± 53.34  [205.40–264.47] | 307.95 ± 97.93  [260.74–355.15] | 295.86 ± 103.97  [248.53–343.18] | 251.78 ± 67.59  [218.16–285.39] | 245.75 ± 22.05  [234.00–257.50] | 2.963 | 0.015 | 0.120 |
| SRT_Acc | 92.87 ± 13.03  [90.46–95.28] | 94.81 ± 5.74  [92.49–97.13] | 95.67 ± 5.62  [92.55–98.78] | 96.58 ± 4.43  [94.45–98.71] | 90.95 ± 17.22  [83.11–98.79] | 85.28 ± 24.04  [73.32–97.23] | 93.75 ± 5.00  [91.09–96.41] | 1.969 | 0.089 | 0.083 |
| CRT_Avg | 450.91 ± 55.94  [408.41–429.07] | 429.54 ± 53.17  [408.06–451.02] | 394.27 ± 64.32  [358.65–429.89] | 408.21 ± 48.99  [384.60–431.82] | 441.76 ± 50.13  [418.94–464.58] | 419.56 ± 72.36  [383.57–455.54] | 405.50 ± 34.24  [387.26–423.74] | 1.162 | 0.332 | 0.051 |
| CRT_Acc | 79.18 ± 21.97  [75.12–83.24] | 79.31 ± 25.99  [68.81–89.81] | 76.60 ± 26.49  [61.93–91.27] | 85.37 ± 14.92  [78.18–92.56] | 68.38 ± 23.94  [57.48–79.28] | 82.50 ± 17.71  [73.69–91.30] | 84.50 ± 15.43  [76.28–92.72] | 1.676 | 0.146 | 0.071 |
| TMTA_Ct | 38.03 ± 9.55  [36.27–39.80] | 38.06 ± 7.48  [35.04–41.08] | 33.16 ± 7.24  [29.15–37.17] | 39.65 ± 14.25  [32.78–46.52] | 42.98 ± 9.80  [38.52–47.44] | 36.35 ± 8.71  [32.02–40.69] | 36.02 ± 8.71  [33.38–38.66] | 2.410 | 0.041 | 0.100 |
| TMTA_Er | 0.15 ± 0.60  [0.04–0.26] | 0.23 ± 0.99  [-0.17–0.63] | 0.27 ± 0.59  [-0.06–0.60] | 0.00 ± 0.00  0.00–0.00] | 0.19 ± 0.51  [-0.04–0.42] | 0.17 ± 0.51  [-0.09–0.42] | 0.00± 0.00  0.00–0.00] | 0.666 | 0.650 | 0.030 |
| TMTB_Ct | 86.05 ± 34.73  [79.64–92.47] | 77.10 ± 20.26c**  [68.91–85.28] | 79.16 ± 33.66  [60.51–97.80] | 115.45 ± 48.73a,e**,f*  [91.96–138.94] | 91.82 ± 30.03c**  [78.15–105.49] | 72.95 ± 27.14c*  [59.45–86.45] | 79.34 ± 30.92  [62.87–95.82] | 4.547 | <0.001 | 0.173 |
| TMTB_Er | 7.51 ± 8.32  [5.98–9.05] | 8.96 ± 7.93  [4.95–12.97] | 6.07 ± 5.95  [2.77–9.36] | 9.68 ± 5.05  [7.25–12.11] | 10.10 ± 9.77  [4.74–15.45] | 5.56 ± 5.51  [2.32–8.79] | 2.75 ± 1.99  [0.62–4.88] | 2.131 | 0.067 | 0.089 |
| TMTB_B-A diff | 40.95 ± 19.92  [37.27–44.63] | 39.00 ± 17.12  [32.09–45.92] | 39.33 ± 16.06  [30.44–48.22] | 49.49 ± 21.64  [39.05–59.92] | 45.51 ± 24.69  [34.27–56.74] | 36.62 ± 22.56  [25.41–47.84] | 34.38 ± 11.62  [28.19-40.58] | 1.540 | 0.183 | 0.066 |
| TMTB_B/A ratio | 2.25 ± 0.72  [2.12–2.38] | 2.04 ± 0.45  [1.86–2.22] | 2.22 ± 0.67  [1.85–2.59] | 2.88± 0.83  [2.48–3.28] | 2.18 ± 0.68  [1.88–2.49] | 2.00 ± 0.56  [1.73–2.28] | 2.25± 0.88  [1.78–2.71] | 4.336 | 0.001 | 0.166 |
| FKTC_Avg | 415.23 ± 61.34  [403.90–426.56] | 425.04 ± 60.47  [400.61–449.46] | 401.67 ± 55.39  [371.00–432.34] | 437.82 ± 71.42  [403.42–472.27] | 405.00 ± 61.07  [377.20–432.80] | 395.84 ± 57.39  [367.29–424.37] | 420.38 ± 56.44  [390.30–450.45] | 1.313 | 0.264 | 0.057 |
| FKTC_Acc | 86.03 ± 20.66  [82.21–89.84] | 77.54 ± 27.74  [66.34–88.74] | 97.07 ± 6.25  [93.61–100.53] | 90.74 ± 10.56  [85.65–95.83] | 79.71 ± 22.87  [69.31–90.12] | 82.83 ± 22.77  [71.51–94.15] | 95.75 ± 8.01  [91.48–100.02] | 3.453 | 0.006 | 0.137 |
| FKTI_Avg | 450.16 ± 111.49  [429.56–470.75] | 435.65 ± 130.69  [382.87–488.44] | 454.80 ± 56.10  [423.73–485.87] | 450.26 ± 134.40  [385.49–515.04] | 438.76 ± 144.83  [372.84–504.69] | 447.56 ± 76.01  [409.76–485.35] | 487.13 ± 69.53  [450.07–524.18] | 0.480 | 0.791 | 0.022 |
| FKTI_Acc | 66.31 ± 22.45  [62.17–70.46] | 64.19 ± 21.53  [55.50–72.89] | 75.40 ± 20.83  [63.87–86.93] | 63.90 ± 23.01  [52.81–74.98] | 54.91 ± 23.36  [44.27–65.54] | 67.39 ± 21.47  [56.71–78.07] | 77.88± 18.56  [67.99–87.76] | 2.713 | 0.024 | 0.111 |
| DFT_Fd | 6.58 ± 3.48  [5.94–7.23] | 7.04 ± 3.64  [5.57–8.51] | 8.13 ± 4.60  [5.59–10.68] | 6.74 ± 2.28  [5.64–7.84] | 5.19 ± 2.82  [3.91–6.48] | 5.50 ± 4.02  [3.50–7.50] | 7.25 ± 2.77  [5.78–8.73] | 1.904 | 0.099 | 0.080 |
| DFT_Ed | 6.86 ± 3.81  [6.16–7.56] | 7.00 ± 3.27  [5.68–8.32] | 8.33 ± 3.85  [6.20–10.46] | 9.00 ± 2.77 d***  [7.67–10.34] | 4.05 ± 3.96 b**, c***, f*  [2.25–5.85] | 5.89± 4.14  [3.83–7.95] | 7.50 ± 2.88 d*  [5.97–9.03] | 5.031 | <0.001 | 0.188 |
| DFT_Sd | 2.70 ± 2.86  [2.17–3.22] | 1.46 ± 2.79  [0.34–2.59] | 4.40 ± 2.29  [3.13–5.67] | 3.74 ± 2.85  [2.37–5.11] | 1.57 ± 2.29  [0.53–2.62] | 3.00 ± 3.05  [1.48–4.52] | 3.00 ± 2.83  [1.49–4.51] | 3.651 | 0.004 | 0.143 |
| DFT_Tc | 16.05 ± 7.30  [14.70–17.40] | 15.50 ± 6.64  [12.82–18.18] | 20.87 ± 9.56  [15.57–26.16] | 19.47 ± 4.33  [17.39–21.56] | 11.29 ± 6.30 b***, c**, f*  [8.42–14.15] | 13.28 ± 6.87  [9.87–16.70] | 17.75 ± 5.88d*  [14.62–20.88] | 5.594 | <0.001 | 0.204 |
| MRT | 7.34 ± 4.65  [6.48–8.20] | 6.27 ± 3.72  [4.77–7.77] | 7.20 ± 3.88  [5.05–9.35] | 6.79 ± 5.87  [3.96–9.62] | 6.33± 3.92  [4.55–8.12] | 8.83 ± 5.64  [6.03–11.64] | 9.50 ± 4.23  [7.25–11.75] | 1.635 | 0.157 | 0.070 |
| SVT | 7.10 ± 4.45  [6.27–7.92] | 5.46 ± 2.67  [4.38–6.54] | 8.67 ± 4.03  [6.44–10.90] | 6.00 ± 6.45  [2.89–9.11] | 6.33 ± 3.62  [4.68–7.98] | 9.50 ± 5.09  [6.97–12.03] | 7.88 ± 3.12  [6.21–94] | 2.778 | 0.021 | 0.113 |
| **Notes:** Data are Mean ± SD [95% CI]. F, p, and η²p are from one-way ANOVA (four groups: 8–11, 12–14, 15–16, 17–18 years). Bonferroni-adjusted post hoc comparisons and Cohen’s d are provided. Abbreviations: SRT = simple reaction time; CRT = choice reaction time; TMT = trail making test; TMTB_B-A diff =t on TMT-B−time on TMT-A ; TMTB_B/A ratio = time on TMT-B/ time on TMT-A; FKT = Flanker task (C = congruent, I = incongruent); DFT = design fluency test; Fd = filled dots condition; Ed = empty dots condition; Er = error; Sd = switching dots condition; Tc = total correct designs; MRT = mental rotation test; SVT = spatial visualization test; Avg = average (mean) value; Acc = percentage (%) of correct responses. a, b, c, d different from group 1, group 2, group 3 and group 4 and *, ** and *** represents between-group comparisons for a p < 0.05, < 0.01 and < 0.001 (respectively). | | | | | | | | | | | |
